# Supplementary material for: Spectroscopic study of the microstructure and phase transition of regioregular poly(3-dodecylthiophene)
Source: Royal Society of Chemistry journal article supplement (doi:10.1039/c2sm07191f), 2012-01-01
Supplement: c2sm07191f.pdf [file c2sm07191f.pdf]

## Supplementary Information

# Spectroscopic Study of Microstructure and Phase Transition of Regioregular Poly(3-dodecylthiophene)

*Yan Guo, Ying Jin and Zhaohui Su\**

State Key Laboratory of Polymer Physics and Chemistry, Changchun Institute of Applied Chemistry,  
5625 Renmin Street, Jilin, Changchun 130022, People's Republic of China

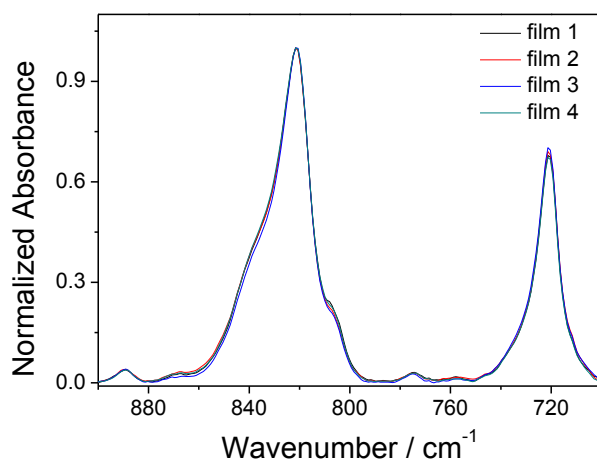

Fig. S1 IR spectra of 4 replicate P3DDT films at 20 °C. The 4 spectra overlap completely, indicating that the IR data are highly reproducible.

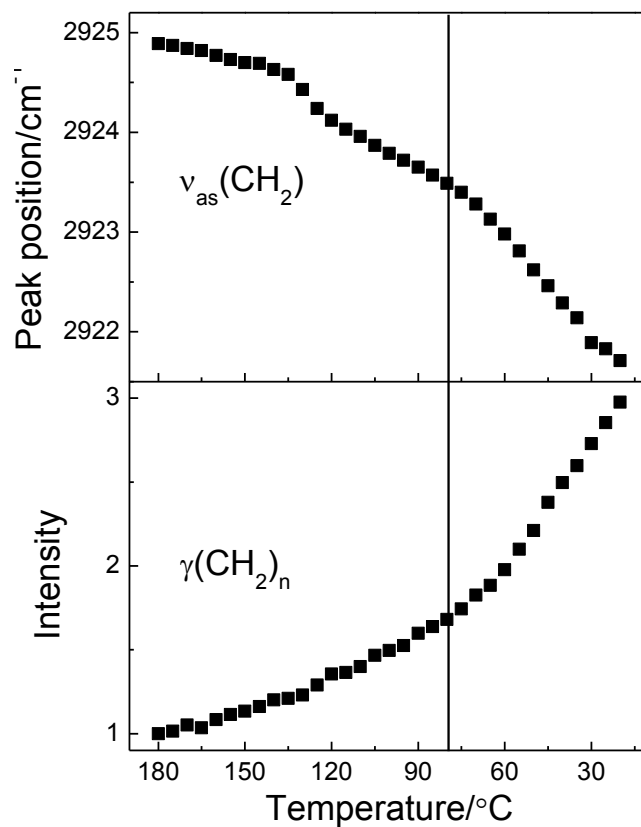

Fig. S2 Peak position of  $\text{CH}_2$  asymmetric stretching band and relative intensity of  $(\text{CH}_2)_n$  in-plane rocking band for P3DDT as functions of temperature at first cooling. The dash line marks 80 °C.

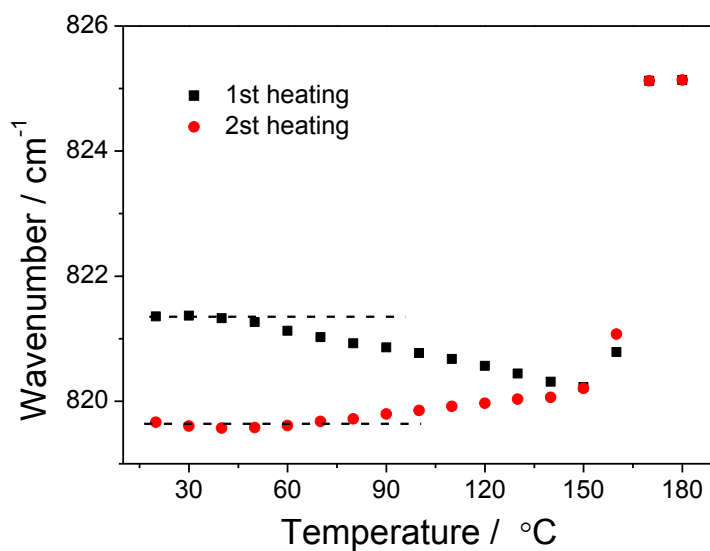

Fig. S3 Peak position of the component at  $820 \text{ cm}^{-1}$  as a function of temperature for the first (black) and second (red) heatings. The dash lines are to guide the eye.
